# Supplementary material for: Comparative Transcriptome and Metabolome Analysis of Resistant and Susceptible Piper Species Upon Infection by the Oomycete Phytophthora Capsici
Source: Front Plant Sci. 2022 Jun 23;13:864927. doi: 10.3389/fpls.2022.864927 (PMC9278165; doi:10.3389/fpls.2022.864927)
Supplement: Supplementary Table S4 — Details of differentially expressed profiles (clusters) including genes involved in plant hormone signal transduction. [file Table_4.XLSX]

## Sheet: Sheet1
Table S4 Details of differentially expressed profiles (clusters) including genes involved in plant hormone signal transduction
Gene ID	Annotation	Description	GO terms	Gene name	Gene family	Pathway	Cluster in Figure 1
Pn1.1661	AT2G43790	Encodes a MAP kinase induced by pathogens, ethylene biosynthesis, oxidative stress and osmotic stress.Also involved in ovule development. Homozygous mutants in a MPK3 heterozygous background are female sterile due to defects in integument development.MPK6 appears to be associated with the microsomal compartment and may be involved in mediating secretory processes.	GO:0000165;GO:0000302;GO:0000303;GO:0004672;GO:0004707;GO:0005515;GO:0005634;GO:0005802;GO:0006612;GO:0006970;GO:0006979;GO:0007154;GO:0007165;GO:0009409;GO:0009524;GO:0009574;GO:0009651;GO:0009723;GO:0009733;GO:0009737;GO:0009738;GO:0009743;GO:0009751;GO:0009862;GO:0009864;GO:0009867;GO:0009873;GO:0010120;GO:0010224;GO:0010229;GO:0010363;GO:0010374;GO:0016301;GO:0016310;GO:0030968;GO:0031348;GO:…	ATMAPK6.ATMPK6.MAPK6.MPK6	MPK6	Ethylene	4
Pn3.1991	AT1G45249	Leucine zipper transcription factor that binds to the abscisic acid (ABA)responsive element (ABRE) motif in the promoter region of ABA-inducible genes. Enhances drought tolerance in vegetative tissues. Required for normal glucose response. Localized in the nucleus. Expressed constitutively in roots, leaf vascular tissues, and hydathodes or in all tissues under stress conditions. It's phosphorylat…	GO:0003677;GO:0003700;GO:0005515;GO:0005634;GO:0009414;GO:0009651;GO:0009737;GO:0009738;GO:0010255;GO:0045893	ABF2.AREB1.AtABF2.ATAREB1	ABF	ABA	3
Pn16.646	AT2G36270	Encodes a member of the basic leucine zipper transcription factor family, involved in ABA signalling during seed maturation and germination. The Arabidopsis abscisic acid (ABA)-insensitive abi5 mutants have pleiotropic defects in ABA response, including decreased sensitivity to ABA inhibition of germination and altered expression of some ABA-regulated genes. Comparison of seed and ABA-inducible v…	GO:0003677;GO:0003700;GO:0005515;GO:0005634;GO:0006355;GO:0009414;GO:0009640;GO:0009651;GO:0009686;GO:0009737;GO:0009738;GO:0009739;GO:0009740;GO:0009793;GO:0009845;GO:0009909;GO:0009933;GO:0010162;GO:0010182;GO:0010187;GO:0010200;GO:0010228;GO:0016567;GO:0019915;GO:0045893;GO:0048316;GO:0050826	ABI5.AtABI5.GIA1	ABF	ABA	1
Pn32.247	AT3G56850	Encodes an ABA-responsive element binding protein with a bZIP domain. Located in the nucleus and expressed in the embryo during seed maturation.	GO:0003677;GO:0003700;GO:0005634;GO:0006355;GO:0009737;GO:0009738;GO:0045893	AREB3.DPBF3	ABF	ABA	4
Pn4.11	AT3G56850	Encodes an ABA-responsive element binding protein with a bZIP domain. Located in the nucleus and expressed in the embryo during seed maturation.	GO:0003677;GO:0003700;GO:0005634;GO:0006355;GO:0009737;GO:0009738;GO:0045893	AREB3.DPBF3	ABF	ABA	7
Pn15.2263	AT3G21510	Encodes AHP1, one of the six Arabidopsis thaliana histidine phosphotransfer proteins (AHPs). AHPs function as redundant positive regulators of cytokinin signaling. Members of the AHP gene family include: AT3G21510 (AHP1), AT3G29350 (AHP2), AT5G39340 (AHP3), AT3G16360 (AHP4), AT1G03430 (AHP5) and AT1G80100 (AHP6).	GO:0000041;GO:0000160;GO:0005515;GO:0005634;GO:0005737;GO:0009553;GO:0009736;GO:0009927;GO:0010029;GO:0015698;GO:0016049;GO:0031537;GO:0043424;GO:0048831;GO:0051301;GO:0080036	AHP1	AHP	CK	7
Pn11.1063	AT3G16360	Encodes AHP4, a histidine-containing phosphotransmitter involved in Histidine (His)-to-Aspartate (Asp) phosphorelay signal transduction. AHP4 is one of the six Arabidopsis thaliana histidine phosphotransfer proteins (AHPs). AHPs function as redundant positive regulators of cytokinin signaling. Members of the AHP gene family include: AT3G21510 (AHP1), AT3G29350 (AHP2), AT5G39340 (AHP3), AT3G16360 …	GO:0000160;GO:0005634;GO:0005737;GO:0009736;GO:0009927;GO:0016772;GO:0080036	AHP4	AHP	CK	5
Pn12.1260	AT1G59750	Encodes a member of the auxin response factor family. ARFs bind to the cis element 5'-TGTCTC-3' ARFs mediate changes in gene expression in response to auxin. ARF's form heterodimers with IAA/AUX genes. ARF1 enhances mutant phenotypes of ARF2 and may act with ARF2 to control aspects of maturation and senescence.ARF1:LUC and 3xHA:ARF1 proteins have a half-life of ~3-4 hours and their degradation is…	GO:0003677;GO:0003700;GO:0005515;GO:0005634;GO:0006306;GO:0006342;GO:0006346;GO:0006355;GO:0007267;GO:0009616;GO:0009733;GO:0010150;GO:0010267;GO:0016246;GO:0035196;GO:0045892	ARF1	ARF	Auxin	7
Pn40.1	AT1G59750	Encodes a member of the auxin response factor family. ARFs bind to the cis element 5'-TGTCTC-3' ARFs mediate changes in gene expression in response to auxin. ARF's form heterodimers with IAA/AUX genes. ARF1 enhances mutant phenotypes of ARF2 and may act with ARF2 to control aspects of maturation and senescence.ARF1:LUC and 3xHA:ARF1 proteins have a half-life of ~3-4 hours and their degradation is…	GO:0003677;GO:0003700;GO:0005515;GO:0005634;GO:0006306;GO:0006342;GO:0006346;GO:0006355;GO:0007267;GO:0009616;GO:0009733;GO:0010150;GO:0010267;GO:0016246;GO:0035196;GO:0045892	ARF1	ARF	Auxin	5
Pn1.249	AT1G19850	Encodes a transcription factor (IAA24) mediating embryo axis formation and vascular development. Similar to AUXIN RESPONSIVE FACTOR 1 (ARF1) shown to bind to auxin responsive elements (AREs), and to the maize transcriptional activator VIVIPAROUS 1( VP1). In situ hybridization shows expression in provascular tissue of embryos, the emerging shoot primordia, then is restricted to provascular tissue,…	GO:0003700;GO:0005515;GO:0005634;GO:0006346;GO:0006355;GO:0007155;GO:0009733;GO:0009741;GO:0009855;GO:0009886;GO:0009887;GO:0009908;GO:0009909;GO:0009942;GO:0009944;GO:0009965;GO:0010014;GO:0010051;GO:0010073;GO:0010090;GO:0010305;GO:0016020;GO:0016246;GO:0031048;GO:0042802;GO:0044212;GO:0045010;GO:0048364;GO:0048439;GO:0048481;GO:0048507;GO:0048519;GO:0048527;GO:0048765;GO:0051567;GO:0071555	ARF5.IAA24.MP	ARF	Auxin	4
Pn28.171	AT5G20730	Encodes an auxin-regulated transcriptional activator. Activates expression of IAA1 and IAA9 in the presence of auxin. Mutants affect blue light and gravitropic and auxin mediated growth responses. Together with AUX19, it is involved in the response to ethylene. In the arf7 arf19 double mutant, several auxin-responsive genes (e.g. IAA5, LBD16, LBD29 and LBD33) are no longer upregulated by auxin.	GO:0003677;GO:0003700;GO:0005515;GO:0005634;GO:0006355;GO:0009630;GO:0009638;GO:0009723;GO:0009733;GO:0009741;GO:0009785;GO:0010311;GO:0040008;GO:0045893;GO:0048366;GO:0048527	ARF7.BIP.IAA21.IAA23.IAA25.MSG1.NPH4.TIR5	ARF	Auxin	1
Pn28.172	AT5G20730	Encodes an auxin-regulated transcriptional activator. Activates expression of IAA1 and IAA9 in the presence of auxin. Mutants affect blue light and gravitropic and auxin mediated growth responses. Together with AUX19, it is involved in the response to ethylene. In the arf7 arf19 double mutant, several auxin-responsive genes (e.g. IAA5, LBD16, LBD29 and LBD33) are no longer upregulated by auxin.	GO:0003677;GO:0003700;GO:0005515;GO:0005634;GO:0006355;GO:0009630;GO:0009638;GO:0009723;GO:0009733;GO:0009741;GO:0009785;GO:0010311;GO:0040008;GO:0045893;GO:0048366;GO:0048527	ARF7.BIP.IAA21.IAA23.IAA25.MSG1.NPH4.TIR5	ARF	Auxin	1
Pn44.65	AT5G20730	Encodes an auxin-regulated transcriptional activator. Activates expression of IAA1 and IAA9 in the presence of auxin. Mutants affect blue light and gravitropic and auxin mediated growth responses. Together with AUX19, it is involved in the response to ethylene. In the arf7 arf19 double mutant, several auxin-responsive genes (e.g. IAA5, LBD16, LBD29 and LBD33) are no longer upregulated by auxin.	GO:0003677;GO:0003700;GO:0005515;GO:0005634;GO:0006355;GO:0009630;GO:0009638;GO:0009723;GO:0009733;GO:0009741;GO:0009785;GO:0010311;GO:0040008;GO:0045893;GO:0048366;GO:0048527	ARF7.BIP.IAA21.IAA23.IAA25.MSG1.NPH4.TIR5	ARF	Auxin	4
Pn4.1280	AT3G16857	Encodes an Arabidopsis response regulator (ARR) protein that acts in concert with other type-B ARRs in the cytokinin signaling pathway.	GO:0000156;GO:0003700;GO:0005515;GO:0005634;GO:0006487;GO:0006635;GO:0009735;GO:0009736;GO:0010029;GO:0010043;GO:0010082;GO:0010380;GO:0016558;GO:0031537;GO:0048364;GO:0048367;GO:0048831;GO:0071368;GO:0080022;GO:0080113	ARR1.RR1	ARR	CK	4
Pn4.3207	AT1G67710	Encodes an Arabidopsis response regulator (ARR) protein that acts in concert with other type-B ARRs in the cytokinin signaling pathway.	GO:0000156;GO:0003700;GO:0005515;GO:0005634;GO:0009735;GO:0009736;GO:0010082	ARR11	ARR	CK	1
Pn10.186	AT2G25180	Encodes an Arabidopsis response regulator (ARR) protein that acts in concert with other type-B ARRs in the cytokinin signaling pathway.	GO:0000156;GO:0003700;GO:0005634;GO:0009735;GO:0009736;GO:0010082;GO:0010380;GO:0031537;GO:0048364;GO:0048367;GO:0071368;GO:0080022;GO:0080113	ARR12.RR12	ARR	CK	1
Pn11.274	AT2G25180	Encodes an Arabidopsis response regulator (ARR) protein that acts in concert with other type-B ARRs in the cytokinin signaling pathway.	GO:0000156;GO:0003700;GO:0005634;GO:0009735;GO:0009736;GO:0010082;GO:0010380;GO:0031537;GO:0048364;GO:0048367;GO:0071368;GO:0080022;GO:0080113	ARR12.RR12	ARR	CK	9
Pn11.386	AT2G25180	Encodes an Arabidopsis response regulator (ARR) protein that acts in concert with other type-B ARRs in the cytokinin signaling pathway.	GO:0000156;GO:0003700;GO:0005634;GO:0009735;GO:0009736;GO:0010082;GO:0010380;GO:0031537;GO:0048364;GO:0048367;GO:0071368;GO:0080022;GO:0080113	ARR12.RR12	ARR	CK	6
Pn9.220	AT2G25180	Encodes an Arabidopsis response regulator (ARR) protein that acts in concert with other type-B ARRs in the cytokinin signaling pathway.	GO:0000156;GO:0003700;GO:0005634;GO:0009735;GO:0009736;GO:0010082;GO:0010380;GO:0031537;GO:0048364;GO:0048367;GO:0071368;GO:0080022;GO:0080113	ARR12.RR12	ARR	CK	4
Pn4.2531	AT1G74890	Encodes a nuclear response regulator that acts as a negative regulator in cytokinin-mediated signal transduction. Transcript accumulates in leaves and roots in response to cytokinin treatment.	GO:0000156;GO:0005515;GO:0005634;GO:0005737;GO:0006355;GO:0007623;GO:0009735;GO:0009736	ARR15	ARR	CK	4
Pn1.3758	AT4G16110	Encodes a pollen-specific transcription factor involved in the expression of nuclear genes for components of mitochondrial complex I in Arabidopsis. Acts in concert with other type-B ARRs in the cytokinin signaling pathway. AHK3 mediates cytokinin-induced phosphorylation of ARR2 on the Asp-80 residue. This phosphorylation plays a positive role of ARR2 in cytokinin-mediated control of leaf longevi…	GO:0000156;GO:0003700;GO:0005515;GO:0005634;GO:0007623;GO:0009723;GO:0009735;GO:0009736;GO:0009873;GO:0010029;GO:0010082;GO:0010119;GO:0010150;GO:0031537;GO:0048364;GO:0048831;GO:0071368;GO:0080113	ARR2.RR2	ARR	CK	3
Pn3.2809	AT4G16110	Encodes a pollen-specific transcription factor involved in the expression of nuclear genes for components of mitochondrial complex I in Arabidopsis. Acts in concert with other type-B ARRs in the cytokinin signaling pathway. AHK3 mediates cytokinin-induced phosphorylation of ARR2 on the Asp-80 residue. This phosphorylation plays a positive role of ARR2 in cytokinin-mediated control of leaf longevi…	GO:0000156;GO:0003700;GO:0005515;GO:0005634;GO:0007623;GO:0009723;GO:0009735;GO:0009736;GO:0009873;GO:0010029;GO:0010082;GO:0010119;GO:0010150;GO:0031537;GO:0048364;GO:0048831;GO:0071368;GO:0080113	ARR2.RR2	ARR	CK	4
Pn43.86	AT4G16110	Encodes a pollen-specific transcription factor involved in the expression of nuclear genes for components of mitochondrial complex I in Arabidopsis. Acts in concert with other type-B ARRs in the cytokinin signaling pathway. AHK3 mediates cytokinin-induced phosphorylation of ARR2 on the Asp-80 residue. This phosphorylation plays a positive role of ARR2 in cytokinin-mediated control of leaf longevi…	GO:0000156;GO:0003700;GO:0005515;GO:0005634;GO:0007623;GO:0009723;GO:0009735;GO:0009736;GO:0009873;GO:0010029;GO:0010082;GO:0010119;GO:0010150;GO:0031537;GO:0048364;GO:0048831;GO:0071368;GO:0080113	ARR2.RR2	ARR	CK	7
Pn28.445	AT2G41310	Encodes an A- type response Regulator that is primarily expressed in the root and is involved in cytokinin-mediated signalling.	GO:0000156;GO:0000160;GO:0005515;GO:0005634;GO:0006355;GO:0007623;GO:0009736;GO:0010029;GO:0031537;GO:0048831	ARR8.ATRR3.RR3	ARR	CK	3
Pn18.206	AT3G57040	response regulator ARR9, A two-component response regulator-like protein with a receiver domain with a conserved aspartate residue and a possible phosphorylation site and at the N-terminal half. Appears to interact with histidine kinase like genes ATHP3 and ATHP2	GO:0000156;GO:0005515;GO:0005634;GO:0006355;GO:0007623;GO:0009735;GO:0009736;GO:0009740;GO:0010162	ARR9.ATRR4	ARR	CK	7
Pn3.2249	AT3G57040	response regulator ARR9, A two-component response regulator-like protein with a receiver domain with a conserved aspartate residue and a possible phosphorylation site and at the N-terminal half. Appears to interact with histidine kinase like genes ATHP3 and ATHP2	GO:0000156;GO:0005515;GO:0005634;GO:0006355;GO:0007623;GO:0009735;GO:0009736;GO:0009740;GO:0010162	ARR9.ATRR4	ARR	CK	3
Pn5.2736	AT3G57040	response regulator ARR9, A two-component response regulator-like protein with a receiver domain with a conserved aspartate residue and a possible phosphorylation site and at the N-terminal half. Appears to interact with histidine kinase like genes ATHP3 and ATHP2	GO:0000156;GO:0005515;GO:0005634;GO:0006355;GO:0007623;GO:0009735;GO:0009736;GO:0009740;GO:0010162	ARR9.ATRR4	ARR	CK	5
Pn19.602	AT5G43700	Auxin inducible protein similar to transcription factors.	GO:0003677;GO:0003700;GO:0005622;GO:0005634;GO:0006417;GO:0007020;GO:0009733;GO:0009736;GO:0010583	ATAUX2-11.IAA4	Aux/IAA	Auxin	6
Pn8.1527	AT5G43700	Auxin inducible protein similar to transcription factors.	GO:0003677;GO:0003700;GO:0005622;GO:0005634;GO:0006417;GO:0007020;GO:0009733;GO:0009736;GO:0010583	ATAUX2-11.IAA4	Aux/IAA	Auxin	5
Pn8.38	AT5G43700	Auxin inducible protein similar to transcription factors.	GO:0003677;GO:0003700;GO:0005622;GO:0005634;GO:0006417;GO:0007020;GO:0009733;GO:0009736;GO:0010583	ATAUX2-11.IAA4	Aux/IAA	Auxin	7
Pn21.462	AT4G28640	Auxin induced gene, IAA11 (IAA11).	GO:0003700;GO:0005515;GO:0005634;GO:0009506;GO:0009733;GO:0010583	IAA11	Aux/IAA	Auxin	7
Pn8.1525	AT3G04730	early auxin-induced (IAA16)	GO:0003700;GO:0005515;GO:0005634;GO:0006970;GO:0009733;GO:0010583;GO:0046686	IAA16	Aux/IAA	Auxin	7
Pn3.185	AT3G16500	phytochrome-associated protein 1 (PAP1)	GO:0003700;GO:0005634;GO:0006995;GO:0009733	IAA26.PAP1	Aux/IAA	Auxin	4
Pn3.4254	AT3G16500	phytochrome-associated protein 1 (PAP1)	GO:0003700;GO:0005634;GO:0006995;GO:0009733	IAA26.PAP1	Aux/IAA	Auxin	4
Pn15.2354	AT4G29080	phytochrome-associated protein 2 (PAP2)	GO:0003700;GO:0005622;GO:0005634;GO:0006417;GO:0007389;GO:0009733;GO:0048438;GO:0048439	IAA27.PAP2	Aux/IAA	Auxin	4
Pn26.332	AT4G29080	phytochrome-associated protein 2 (PAP2)	GO:0003700;GO:0005622;GO:0005634;GO:0006417;GO:0007389;GO:0009733;GO:0048438;GO:0048439	IAA27.PAP2	Aux/IAA	Auxin	4
Pn3.4514	AT4G29080	phytochrome-associated protein 2 (PAP2)	GO:0003700;GO:0005622;GO:0005634;GO:0006417;GO:0007389;GO:0009733;GO:0048438;GO:0048439	IAA27.PAP2	Aux/IAA	Auxin	7
Pn6.1523	AT5G65670	auxin (indole-3-acetic acid) induced gene	GO:0003700;GO:0005634;GO:0009616;GO:0009733;GO:0009734;GO:0010050;GO:0010583	IAA9	Aux/IAA	Auxin	7
Pn2.2869	AT2G38120	Encodes an auxin influx transporter. AUX1 resides at the apical plasma membrane of protophloem cells and at highly dynamic subpopulations of Golgi apparatus and endosomes in all cell types. AUX1 action in the lateral root cap and/or epidermal cells influences lateral root initiation and positioning.	GO:0000271;GO:0001736;GO:0005215;GO:0005768;GO:0005794;GO:0005886;GO:0006865;GO:0006949;GO:0007155;GO:0007389;GO:0008361;GO:0009624;GO:0009723;GO:0009733;GO:0009825;GO:0009926;GO:0009932;GO:0009958;GO:0009986;GO:0010011;GO:0010015;GO:0010090;GO:0010218;GO:0010311;GO:0010328;GO:0010817;GO:0015171;GO:0016020;GO:0040007;GO:0043481;GO:0045010;GO:0048765;GO:0048767;GO:0048829;GO:0071555	AtAUX1.AUX1.MAP1.PIR1.WAV5	AUX1	Auxin	4
Pn7.1179	AT2G38120	Encodes an auxin influx transporter. AUX1 resides at the apical plasma membrane of protophloem cells and at highly dynamic subpopulations of Golgi apparatus and endosomes in all cell types. AUX1 action in the lateral root cap and/or epidermal cells influences lateral root initiation and positioning.	GO:0000271;GO:0001736;GO:0005215;GO:0005768;GO:0005794;GO:0005886;GO:0006865;GO:0006949;GO:0007155;GO:0007389;GO:0008361;GO:0009624;GO:0009723;GO:0009733;GO:0009825;GO:0009926;GO:0009932;GO:0009958;GO:0009986;GO:0010011;GO:0010015;GO:0010090;GO:0010218;GO:0010311;GO:0010328;GO:0010817;GO:0015171;GO:0016020;GO:0040007;GO:0043481;GO:0045010;GO:0048765;GO:0048767;GO:0048829;GO:0071555	AtAUX1.AUX1.MAP1.PIR1.WAV5	AUX1	Auxin	8
Pn7.937	AT2G38120	Encodes an auxin influx transporter. AUX1 resides at the apical plasma membrane of protophloem cells and at highly dynamic subpopulations of Golgi apparatus and endosomes in all cell types. AUX1 action in the lateral root cap and/or epidermal cells influences lateral root initiation and positioning.	GO:0000271;GO:0001736;GO:0005215;GO:0005768;GO:0005794;GO:0005886;GO:0006865;GO:0006949;GO:0007155;GO:0007389;GO:0008361;GO:0009624;GO:0009723;GO:0009733;GO:0009825;GO:0009926;GO:0009932;GO:0009958;GO:0009986;GO:0010011;GO:0010015;GO:0010090;GO:0010218;GO:0010311;GO:0010328;GO:0010817;GO:0015171;GO:0016020;GO:0040007;GO:0043481;GO:0045010;GO:0048765;GO:0048767;GO:0048829;GO:0071555	AtAUX1.AUX1.MAP1.PIR1.WAV5	AUX1	Auxin	4
Pn4.2164	AT5G01240	Encodes LAX1 (LIKE AUXIN RESISTANT), a member of the AUX1 LAX family of auxin influx carriers. Required for the establishment of embryonic root cell organization.	GO:0005215;GO:0005886;GO:0006865;GO:0010328;GO:0016020;GO:0048829	LAX1	AUX1	Auxin	4
Pn16.594	AT2G21050	Encodes LAX2 (LIKE AUXIN RESISTANT), a member of the AUX1 LAX family of auxin influx carriers. Required for the establishment of embryonic root cell organization.	GO:0005215;GO:0005886;GO:0006865;GO:0009624;GO:0010075;GO:0010588;GO:0015171;GO:0016020;GO:0048829	LAX2	AUX1	Auxin	5
Pn16.598	AT2G21050	Encodes LAX2 (LIKE AUXIN RESISTANT), a member of the AUX1 LAX family of auxin influx carriers. Required for the establishment of embryonic root cell organization.	GO:0005215;GO:0005886;GO:0006865;GO:0009624;GO:0010075;GO:0010588;GO:0015171;GO:0016020;GO:0048829	LAX2	AUX1	Auxin	8
Pn17.909	AT4G39400	Encodes a plasma membrane localized leucine-rich repeat receptor kinase involved in brassinosteroid signal transduction. BRI1 ligand is brassinolide which binds at the extracellular domain. Binding results in phosphorylation of the kinase domain which activates the BRI1 protein leading to BR responses. Residue T-1049 and either S-1044 or T-1045 were essential for kinase function in vitro and norm…	GO:0000271;GO:0002237;GO:0004672;GO:0004674;GO:0005496;GO:0005515;GO:0005768;GO:0005886;GO:0007165;GO:0009729;GO:0009742;GO:0009825;GO:0009826;GO:0009911;GO:0009932;GO:0010103;GO:0010224;GO:0010268;GO:0010584;GO:0010817;GO:0016301;GO:0016310;GO:0042742;GO:0042802;GO:0042803;GO:0043234;GO:0043481;GO:0046982;GO:0048366;GO:0048443;GO:0048657;GO:0048767;GO:0060548;GO:0071555;GO:1900140	ATBRI1.BIN1.BRI1.CBB2.DWF2	BRI1	BR	2
Pn15.911	AT5G46570	Encodes BR-signaling kinase 2 (BSK2), one of the three homologous BR-signaling kinases (BSK1, AT4G35230; BSK2, AT5G46570; BSK3, AT4G00710). Mediates signal transduction from receptor kinase BRI1 by functioning as the substrate of BRI1. Plasma membrane localized.	GO:0005886;GO:0009742;GO:0016301	BSK2	BSK	BR	7
Pn19.1368	AT5G46570	Encodes BR-signaling kinase 2 (BSK2), one of the three homologous BR-signaling kinases (BSK1, AT4G35230; BSK2, AT5G46570; BSK3, AT4G00710). Mediates signal transduction from receptor kinase BRI1 by functioning as the substrate of BRI1. Plasma membrane localized.	GO:0005886;GO:0009742;GO:0016301	BSK2	BSK	BR	7
Pn17.1103	AT4G00710	Encodes BR-signaling kinase 3 (BSK3), one of the three homologous BR-signaling kinases (BSK1, AT4G35230; BSK2, AT5G46570; BSK3, AT4G00710). Mediates signal transduction from receptor kinase BRI1 by functioning as the substrate of BRI1. Plasma membrane localized.	GO:0005886;GO:0009506;GO:0009742;GO:0016020;GO:0016301	BSK3	BSK	BR	5
Pn17.726	AT4G00710	Encodes BR-signaling kinase 3 (BSK3), one of the three homologous BR-signaling kinases (BSK1, AT4G35230; BSK2, AT5G46570; BSK3, AT4G00710). Mediates signal transduction from receptor kinase BRI1 by functioning as the substrate of BRI1. Plasma membrane localized.	GO:0005886;GO:0009506;GO:0009742;GO:0016020;GO:0016301	BSK3	BSK	BR	1
Pn16.2086	AT1G63500	NA	GO:0005886;GO:0009506	BSK7	BSK	BR	7
Pn16.2086	AT1G63500	NA	GO:0005886;GO:0009506	BSK7	BSK	BR	7
Pn24.853	AT1G63500	NA	GO:0005886;GO:0009506	BSK7	BSK	BR	1
Pn13.1074	AT1G75080	Encodes a positive regulator of the brassinosteroid (BR) signalling pathway that mediates both downstream BR responses and negative feedback regulation of BR biosynthesis. There is evidence for phosphorylation-dependent nucleocytoplasmic shuttling of BZR1. GSK3-like kinases (including BIN2), 14-3-3 proteins, and the phosphatase BSU1 seem to participate in this process. Phosphorylation also appear…	GO:0003677;GO:0003700;GO:0005515;GO:0005634;GO:0005829;GO:0006355;GO:0009742;GO:0045892;GO:0048316;GO:0048481	BZR1	BZR1	BR	7
Pn2.528	AT1G75080	Encodes a positive regulator of the brassinosteroid (BR) signalling pathway that mediates both downstream BR responses and negative feedback regulation of BR biosynthesis. There is evidence for phosphorylation-dependent nucleocytoplasmic shuttling of BZR1. GSK3-like kinases (including BIN2), 14-3-3 proteins, and the phosphatase BSU1 seem to participate in this process. Phosphorylation also appear…	GO:0003677;GO:0003700;GO:0005515;GO:0005634;GO:0005829;GO:0006355;GO:0009742;GO:0045892;GO:0048316;GO:0048481	BZR1	BZR1	BR	6
Pn15.1461	AT2G39940	Encodes a protein containing Leu-rich repeats and a degenerate F-box motif. Associates with AtCUL1, AtRbx1, and the Skp1-like proteins ASK1 and ASK2 to assemble SCF COI1 ubiquitin-ligase complexes in planta. A single amino acid substitution in the F-box motif of COI1 abolishes the formation of the SCF(COI1) complexes and results in loss of the JA response. Required for wound- and jasmonates-induc…	GO:0002237;GO:0004842;GO:0005515;GO:0005634;GO:0006511;GO:0006952;GO:0007165;GO:0009611;GO:0009625;GO:0009641;GO:0009753;GO:0009861;GO:0009867;GO:0009909;GO:0010103;GO:0010118;GO:0010218;GO:0019005;GO:0031146;GO:0031348;GO:0042742;GO:0042752;GO:0048443;GO:0050832	COI1	COI1	JA	4
Pn16.955	AT2G39940	Encodes a protein containing Leu-rich repeats and a degenerate F-box motif. Associates with AtCUL1, AtRbx1, and the Skp1-like proteins ASK1 and ASK2 to assemble SCF COI1 ubiquitin-ligase complexes in planta. A single amino acid substitution in the F-box motif of COI1 abolishes the formation of the SCF(COI1) complexes and results in loss of the JA response. Required for wound- and jasmonates-induc…	GO:0002237;GO:0004842;GO:0005515;GO:0005634;GO:0006511;GO:0006952;GO:0007165;GO:0009611;GO:0009625;GO:0009641;GO:0009753;GO:0009861;GO:0009867;GO:0009909;GO:0010103;GO:0010118;GO:0010218;GO:0019005;GO:0031146;GO:0031348;GO:0042742;GO:0042752;GO:0048443;GO:0050832	COI1	COI1	JA	1
Pn24.145	AT2G39940	Encodes a protein containing Leu-rich repeats and a degenerate F-box motif. Associates with AtCUL1, AtRbx1, and the Skp1-like proteins ASK1 and ASK2 to assemble SCF COI1 ubiquitin-ligase complexes in planta. A single amino acid substitution in the F-box motif of COI1 abolishes the formation of the SCF(COI1) complexes and results in loss of the JA response. Required for wound- and jasmonates-induc…	GO:0002237;GO:0004842;GO:0005515;GO:0005634;GO:0006511;GO:0006952;GO:0007165;GO:0009611;GO:0009625;GO:0009641;GO:0009753;GO:0009861;GO:0009867;GO:0009909;GO:0010103;GO:0010118;GO:0010218;GO:0019005;GO:0031146;GO:0031348;GO:0042742;GO:0042752;GO:0048443;GO:0050832	COI1	COI1	JA	5
Pn26.789	AT2G39940	Encodes a protein containing Leu-rich repeats and a degenerate F-box motif. Associates with AtCUL1, AtRbx1, and the Skp1-like proteins ASK1 and ASK2 to assemble SCF COI1 ubiquitin-ligase complexes in planta. A single amino acid substitution in the F-box motif of COI1 abolishes the formation of the SCF(COI1) complexes and results in loss of the JA response. Required for wound- and jasmonates-induc…	GO:0002237;GO:0004842;GO:0005515;GO:0005634;GO:0006511;GO:0006952;GO:0007165;GO:0009611;GO:0009625;GO:0009641;GO:0009753;GO:0009861;GO:0009867;GO:0009909;GO:0010103;GO:0010118;GO:0010218;GO:0019005;GO:0031146;GO:0031348;GO:0042742;GO:0042752;GO:0048443;GO:0050832	COI1	COI1	JA	4
Pn3.4353	AT5G35750	Encodes histidine kinase AHK2.	GO:0004673;GO:0005034;GO:0005515;GO:0005886;GO:0006970;GO:0009414;GO:0009636;GO:0009651;GO:0009736;GO:0009737;GO:0009884;GO:0009909;GO:0010029;GO:0010087;GO:0010271;GO:0019900;GO:0031537;GO:0034757;GO:0042802;GO:0043424;GO:0048509;GO:0048831;GO:0070417;GO:0071215;GO:0080117	AHK2.HK2	CRE1	CK	1
Pn20.710	AT1G27320	Encodes a histidine kinases, a cytokinin receptor that controls cytokinin-mediated leaf longevity through a specific phosphorylation of the response regulator, ARR2.	GO:0000303;GO:0004673;GO:0005034;GO:0005515;GO:0005886;GO:0006635;GO:0006970;GO:0007165;GO:0007623;GO:0008219;GO:0009409;GO:0009414;GO:0009651;GO:0009736;GO:0009755;GO:0009863;GO:0009873;GO:0009884;GO:0009909;GO:0010029;GO:0010087;GO:0010150;GO:0010271;GO:0016036;GO:0016558;GO:0031537;GO:0034757;GO:0042742;GO:0043424;GO:0048509;GO:0048831;GO:0070417;GO:0071215;GO:0071329;GO:0080117	AHK3.HK3	CRE1	CK	4
Pn21.345	AT1G27320	Encodes a histidine kinases, a cytokinin receptor that controls cytokinin-mediated leaf longevity through a specific phosphorylation of the response regulator, ARR2.	GO:0000303;GO:0004673;GO:0005034;GO:0005515;GO:0005886;GO:0006635;GO:0006970;GO:0007165;GO:0007623;GO:0008219;GO:0009409;GO:0009414;GO:0009651;GO:0009736;GO:0009755;GO:0009863;GO:0009873;GO:0009884;GO:0009909;GO:0010029;GO:0010087;GO:0010150;GO:0010271;GO:0016036;GO:0016558;GO:0031537;GO:0034757;GO:0042742;GO:0043424;GO:0048509;GO:0048831;GO:0070417;GO:0071215;GO:0071329;GO:0080117	AHK3.HK3	CRE1	CK	4
Pn37.160	AT2G01830	Histidine kinase: cytokinin-binding receptor that transduces cytokinin signals across the plasma membrane	GO:0000160;GO:0004673;GO:0004721;GO:0005034;GO:0005515;GO:0005783;GO:0005886;GO:0006468;GO:0007231;GO:0008272;GO:0009414;GO:0009736;GO:0009744;GO:0009749;GO:0009750;GO:0009884;GO:0009885;GO:0010029;GO:0010086;GO:0016036;GO:0019899;GO:0019901;GO:0019955;GO:0031537;GO:0033500;GO:0042742;GO:0043424;GO:0048509;GO:0048831;GO:0071329	AHK4.ATCRE1.CRE1.WOL.WOL1	CRE1	CK	7
Pn4.1642	AT2G01830	Histidine kinase: cytokinin-binding receptor that transduces cytokinin signals across the plasma membrane	GO:0000160;GO:0004673;GO:0004721;GO:0005034;GO:0005515;GO:0005783;GO:0005886;GO:0006468;GO:0007231;GO:0008272;GO:0009414;GO:0009736;GO:0009744;GO:0009749;GO:0009750;GO:0009884;GO:0009885;GO:0010029;GO:0010086;GO:0016036;GO:0019899;GO:0019901;GO:0019955;GO:0031537;GO:0033500;GO:0042742;GO:0043424;GO:0048509;GO:0048831;GO:0071329	AHK4.ATCRE1.CRE1.WOL.WOL1	CRE1	CK	4
Pn8.1394	AT4G34160	encodes a cyclin D-type protein involved in the switch from cell proliferation to the final stages of differentiation. The gene is transcriptionally regulated by cytokinin and brassinosteroid. Protein interacts with cyclin-dependent kinase inhibitor ICK1.	GO:0000082;GO:0000280;GO:0000911;GO:0005515;GO:0005634;GO:0006275;GO:0009735;GO:0009741;GO:0009744;GO:0010075;GO:0010103;GO:0010389;GO:0010583;GO:0016538;GO:0042023;GO:0042127;GO:0048316;GO:0051225;GO:0051726	CYCD3.CYCD3.1	CYCD3	BR	7
Pn3.3209	AT1G14920	Similar to a putative transcription factor and transcriptional coactivators. Repressor of GA responses and involved in gibberellic acid mediated signaling. Member of the DELLA proteins that restrain the cell proliferation and expansion that drives plant growth. The protein undergoes degradation in response to GA via the 26S proteasome. GAI may be involved in reducing ROS accumulation in response …	GO:0003700;GO:0005515;GO:0005634;GO:0006808;GO:0009651;GO:0009723;GO:0009737;GO:0009739;GO:0009740;GO:0009845;GO:0009863;GO:0009867;GO:0009938;GO:0010029;GO:0010162;GO:0010187;GO:0010218;GO:0010233;GO:0010325;GO:0042538;GO:0048444;GO:2000033;GO:2000377	GAI.RGA2	DELLA	GA	1
Pn8.860	AT1G66350	Negative regulator of GA responses, member of GRAS family of transcription factors. Also belongs to the DELLA proteins that restrain the cell proliferation and expansion that drives plant growth. RGL1 may be involved in reducing ROS accumulation in response to stress by up-regulating the transcription of superoxide dismutases. Rapidly degraded in response to GA. Involved in flower and fruit devel…	GO:0003700;GO:0005634;GO:0009651;GO:0009723;GO:0009737;GO:0009739;GO:0009740;GO:0009845;GO:0009863;GO:0009867;GO:0009938;GO:0010162;GO:0010325;GO:0042538;GO:0048444;GO:2000377	RGL.RGL1	DELLA	GA	5
Pn3.4134	AT2G25490	Encodes an F-box protein involved in the ubiquitin/proteasome-dependent proteolysis of EIN3.	GO:0004842;GO:0005515;GO:0005634;GO:0006511;GO:0009723;GO:0010105;GO:0042752	EBF1.FBL6	EBF1/2	Ethylene	4
Pn15.449	AT5G25350	Arabidopsis thaliana EIN3-binding F-box protein 2 (EBF2) mRNA. Part of the SCF complex, it is located in the nucleus and is involved in the ethylene-response pathway.	GO:0005515;GO:0005634;GO:0006511;GO:0009723;GO:0010105;GO:0019005;GO:0042752	EBF2	EBF1/2	Ethylene	8
Pn30.320	AT5G25350	Arabidopsis thaliana EIN3-binding F-box protein 2 (EBF2) mRNA. Part of the SCF complex, it is located in the nucleus and is involved in the ethylene-response pathway.	GO:0005515;GO:0005634;GO:0006511;GO:0009723;GO:0010105;GO:0019005;GO:0042752	EBF2	EBF1/2	Ethylene	6
Pn18.1294	AT5G03280	Involved in ethylene signal transduction. Acts downstream of CTR1. Positively regulates ORE1 and negatively regulates mir164A,B,C to regulate leaf senescence.	GO:0001736;GO:0002237;GO:0005515;GO:0005886;GO:0006869;GO:0006891;GO:0006970;GO:0006979;GO:0008219;GO:0009408;GO:0009651;GO:0009723;GO:0009725;GO:0009753;GO:0009755;GO:0009789;GO:0009871;GO:0009873;GO:0009926;GO:0010119;GO:0010150;GO:0010182;GO:0010351;GO:0016558;GO:0031348;GO:0042742;GO:0048765;GO:0048825;GO:0050832;GO:0052544;GO:0071281	ATEIN2.CKR1.EIN2.ERA3.ORE2.ORE3.PIR2	EIN2	Ethylene	1
Pn5.504	AT5G03280	Involved in ethylene signal transduction. Acts downstream of CTR1. Positively regulates ORE1 and negatively regulates mir164A,B,C to regulate leaf senescence.	GO:0001736;GO:0002237;GO:0005515;GO:0005886;GO:0006869;GO:0006891;GO:0006970;GO:0006979;GO:0008219;GO:0009408;GO:0009651;GO:0009723;GO:0009725;GO:0009753;GO:0009755;GO:0009789;GO:0009871;GO:0009873;GO:0009926;GO:0010119;GO:0010150;GO:0010182;GO:0010351;GO:0016558;GO:0031348;GO:0042742;GO:0048765;GO:0048825;GO:0050832;GO:0052544;GO:0071281	ATEIN2.CKR1.EIN2.ERA3.ORE2.ORE3.PIR2	EIN2	Ethylene	7
Pn4.394	AT2G27050	ethylene-insensitive3-like1 (EIL1)	GO:0003700;GO:0005515;GO:0005634;GO:0009723;GO:0009873;GO:0042742;GO:0071281	AtEIL1.EIL1	EIN3	Ethylene	6
Pn10.1105	AT3G20770	Encodes EIN3 (ethylene-insensitive3), a nuclear transcription factor that initiates downstream transcriptional cascades for ethylene responses.	GO:0000303;GO:0003677;GO:0003700;GO:0005515;GO:0005634;GO:0006355;GO:0006487;GO:0007165;GO:0008219;GO:0009639;GO:0009651;GO:0009723;GO:0009733;GO:0009737;GO:0009743;GO:0009751;GO:0009755;GO:0009863;GO:0009873;GO:0010182;GO:0042742;GO:0048825;GO:0071281	AtEIN3.EIN3	EIN3	Ethylene	4
Pn14.165	AT1G66340	Similar to prokaryote sensory transduction proteins. Contains a histidine kinase and a response regulator domain. Homodimer. Membrane component. Binds ethylene. Mutations affect ethylene binding and metabolism of other plant hormones such as auxin, cytokinins, ABA and gibberellic acid. Ethylene receptor. Has histidine kinase activity. Is regulated by RTE1.	GO:0000156;GO:0002237;GO:0004673;GO:0005515;GO:0005783;GO:0005789;GO:0006952;GO:0007623;GO:0009408;GO:0009625;GO:0009651;GO:0009690;GO:0009723;GO:0009727;GO:0009733;GO:0009736;GO:0009737;GO:0009739;GO:0009871;GO:0010105;GO:0010119;GO:0010182;GO:0042742;GO:0042802;GO:0050665;GO:0051740;GO:0052544;GO:0071281;GO:1900140	AtETR1.EIN1.ETR.ETR1	ETR	Ethylene	7
Pn5.2136	AT1G66340	Similar to prokaryote sensory transduction proteins. Contains a histidine kinase and a response regulator domain. Homodimer. Membrane component. Binds ethylene. Mutations affect ethylene binding and metabolism of other plant hormones such as auxin, cytokinins, ABA and gibberellic acid. Ethylene receptor. Has histidine kinase activity. Is regulated by RTE1.	GO:0000156;GO:0002237;GO:0004673;GO:0005515;GO:0005783;GO:0005789;GO:0006952;GO:0007623;GO:0009408;GO:0009625;GO:0009651;GO:0009690;GO:0009723;GO:0009727;GO:0009733;GO:0009736;GO:0009737;GO:0009739;GO:0009871;GO:0010105;GO:0010119;GO:0010182;GO:0042742;GO:0042802;GO:0050665;GO:0051740;GO:0052544;GO:0071281;GO:1900140	AtETR1.EIN1.ETR.ETR1	ETR	Ethylene	4
Pn5.442	AT1G66340	Similar to prokaryote sensory transduction proteins. Contains a histidine kinase and a response regulator domain. Homodimer. Membrane component. Binds ethylene. Mutations affect ethylene binding and metabolism of other plant hormones such as auxin, cytokinins, ABA and gibberellic acid. Ethylene receptor. Has histidine kinase activity. Is regulated by RTE1.	GO:0000156;GO:0002237;GO:0004673;GO:0005515;GO:0005783;GO:0005789;GO:0006952;GO:0007623;GO:0009408;GO:0009625;GO:0009651;GO:0009690;GO:0009723;GO:0009727;GO:0009733;GO:0009736;GO:0009737;GO:0009739;GO:0009871;GO:0010105;GO:0010119;GO:0010182;GO:0042742;GO:0042802;GO:0050665;GO:0051740;GO:0052544;GO:0071281;GO:1900140	AtETR1.EIN1.ETR.ETR1	ETR	Ethylene	7
Pn8.1392	AT2G14960	encodes a protein similar to IAA-amido synthases. Lines carrying an insertion in this gene are hypersensitive to auxin.	GO:0005737;GO:0009733;GO:0009741;GO:0010583	GH3.1	GH3	Auxin	2
Pn11.1572	AT2G23170	encodes an IAA-amido synthase that conjugates Asp and other amino acids to auxin in vitro.	GO:0005737;GO:0009733;GO:0010252;GO:0010279	GH3.3	GH3	Auxin	2
Pn28.34	AT5G27320	Encodes a gibberellin (GA) receptor ortholog of the rice GA receptor gene (OsGID1). Has GA-binding activity, showing higher affinity to GA4. Interacts with DELLA proteins in vivo in the presence of GA4.	GO:0005515;GO:0005634;GO:0009723;GO:0009737;GO:0009739;GO:0009740;GO:0009845;GO:0009863;GO:0009867;GO:0009939;GO:0010162;GO:0010325;GO:0010476;GO:0042538;GO:0048444	ATGID1C.GID1C	GID1	GA	7
Pn28.39	AT5G27320	Encodes a gibberellin (GA) receptor ortholog of the rice GA receptor gene (OsGID1). Has GA-binding activity, showing higher affinity to GA4. Interacts with DELLA proteins in vivo in the presence of GA4.	GO:0005515;GO:0005634;GO:0009723;GO:0009737;GO:0009739;GO:0009740;GO:0009845;GO:0009863;GO:0009867;GO:0009939;GO:0010162;GO:0010325;GO:0010476;GO:0042538;GO:0048444	ATGID1C.GID1C	GID1	GA	1
Pn54.30	AT5G27320	Encodes a gibberellin (GA) receptor ortholog of the rice GA receptor gene (OsGID1). Has GA-binding activity, showing higher affinity to GA4. Interacts with DELLA proteins in vivo in the presence of GA4.	GO:0005515;GO:0005634;GO:0009723;GO:0009737;GO:0009739;GO:0009740;GO:0009845;GO:0009863;GO:0009867;GO:0009939;GO:0010162;GO:0010325;GO:0010476;GO:0042538;GO:0048444	ATGID1C.GID1C	GID1	GA	7
Pn8.1350	AT4G24210	F-box protein that is involved in GA signaling. Regulates seed germination. Component of E3 ubiquitin complex. Interacts with DELLA proteins.	GO:0005515;GO:0005634;GO:0009723;GO:0009737;GO:0009740;GO:0009845;GO:0009863;GO:0009867;GO:0009939;GO:0010162;GO:0010325;GO:0019005;GO:0042538;GO:0048444	SLY1	GID2	GA	4
Pn2.2682	AT2G46370	Encodes a jasmonate-amido synthetase that is a member of the GH3 family of proteins. JAR1 catalyzes the formation of a biologically active jasmonyl-isoleucine (JA-Ile) conjugate. JA-Ile promotes the interaction between JAZ1 and COI1 in the jasmonate signaling pathway. JAR1 localizes to the cytoplasm and is also a phytochrome A signaling component. JAR1 is an auxin-induced gene. Loss of function m…	GO:0003824;GO:0005524;GO:0005634;GO:0005737;GO:0005773;GO:0009585;GO:0009611;GO:0009627;GO:0009640;GO:0009694;GO:0009733;GO:0009753;GO:0009861;GO:0009864;GO:0010046;GO:0010119;GO:0010193;GO:0010224;GO:0019899;GO:0031348;GO:0070566;GO:0071365;GO:0080123;GO:2000030;GO:2000377	AtGH3.11.FIN219.JAR1	JAR1	JA	4
Pn4.2962	AT2G46370	Encodes a jasmonate-amido synthetase that is a member of the GH3 family of proteins. JAR1 catalyzes the formation of a biologically active jasmonyl-isoleucine (JA-Ile) conjugate. JA-Ile promotes the interaction between JAZ1 and COI1 in the jasmonate signaling pathway. JAR1 localizes to the cytoplasm and is also a phytochrome A signaling component. JAR1 is an auxin-induced gene. Loss of function m…	GO:0003824;GO:0005524;GO:0005634;GO:0005737;GO:0005773;GO:0009585;GO:0009611;GO:0009627;GO:0009640;GO:0009694;GO:0009733;GO:0009753;GO:0009861;GO:0009864;GO:0010046;GO:0010119;GO:0010193;GO:0010224;GO:0019899;GO:0031348;GO:0070566;GO:0071365;GO:0080123;GO:2000030;GO:2000377	AtGH3.11.FIN219.JAR1	JAR1	JA	9
Pn7.1805	AT2G46370	Encodes a jasmonate-amido synthetase that is a member of the GH3 family of proteins. JAR1 catalyzes the formation of a biologically active jasmonyl-isoleucine (JA-Ile) conjugate. JA-Ile promotes the interaction between JAZ1 and COI1 in the jasmonate signaling pathway. JAR1 localizes to the cytoplasm and is also a phytochrome A signaling component. JAR1 is an auxin-induced gene. Loss of function m…	GO:0003824;GO:0005524;GO:0005634;GO:0005737;GO:0005773;GO:0009585;GO:0009611;GO:0009627;GO:0009640;GO:0009694;GO:0009733;GO:0009753;GO:0009861;GO:0009864;GO:0010046;GO:0010119;GO:0010193;GO:0010224;GO:0019899;GO:0031348;GO:0070566;GO:0071365;GO:0080123;GO:2000030;GO:2000377	AtGH3.11.FIN219.JAR1	JAR1	JA	6
Pn28.166	AT1G19180	JAZ1 is a nuclear-localized protein involved in jasmonate signaling. JAZ1 transcript levels rise in response to a jasmonate stimulus. JAZ1 can interact with the COI1 F-box subunit of an SCF E3 ubiquitin ligase in a yeast-two-hybrid assay only in the presence of jasmonate-isoleucine (JA-ILE) or coronatine. Application of jasmonate methyl ester to Arabidopsis roots reduces the levels of a JAZ1:GUS …	GO:0000165;GO:0005515;GO:0005634;GO:0006612;GO:0007154;GO:0007165;GO:0009409;GO:0009414;GO:0009555;GO:0009611;GO:0009620;GO:0009695;GO:0009723;GO:0009733;GO:0009738;GO:0009753;GO:0009862;GO:0009863;GO:0009867;GO:0009908;GO:0010200;GO:0010363;GO:0030968;GO:0031348;GO:0035556;GO:0042538;GO:0042742;GO:0043069;GO:0050832	AtJAZ1.JAZ1.TIFY10A	JAZ	JA	2
Pn3.1097	AT1G19180	JAZ1 is a nuclear-localized protein involved in jasmonate signaling. JAZ1 transcript levels rise in response to a jasmonate stimulus. JAZ1 can interact with the COI1 F-box subunit of an SCF E3 ubiquitin ligase in a yeast-two-hybrid assay only in the presence of jasmonate-isoleucine (JA-ILE) or coronatine. Application of jasmonate methyl ester to Arabidopsis roots reduces the levels of a JAZ1:GUS …	GO:0000165;GO:0005515;GO:0005634;GO:0006612;GO:0007154;GO:0007165;GO:0009409;GO:0009414;GO:0009555;GO:0009611;GO:0009620;GO:0009695;GO:0009723;GO:0009733;GO:0009738;GO:0009753;GO:0009862;GO:0009863;GO:0009867;GO:0009908;GO:0010200;GO:0010363;GO:0030968;GO:0031348;GO:0035556;GO:0042538;GO:0042742;GO:0043069;GO:0050832	AtJAZ1.JAZ1.TIFY10A	JAZ	JA	6
Pn15.2168	AT3G17860	JAZs are direct targets of the SCFCOI1 E3 ubiquitin-ligase and JA treatment induces their proteasome-mediated degradation. Furthermore, JAI3 negatively regulates the key transcriptional activator of JA responses, AtMYC2. The C-terminal portion of JAZ3, including the Jas domain, appears to be important for JAZ3-COI1 binding in the presence of coronatine.	GO:0005515;GO:0005634;GO:0009611;GO:0009695;GO:0009867;GO:0031347;GO:0042802	JAI3.JAZ3.TIFY6B	JAZ	JA	6
Pn33.104	AT3G17860	JAZs are direct targets of the SCFCOI1 E3 ubiquitin-ligase and JA treatment induces their proteasome-mediated degradation. Furthermore, JAI3 negatively regulates the key transcriptional activator of JA responses, AtMYC2. The C-terminal portion of JAZ3, including the Jas domain, appears to be important for JAZ3-COI1 binding in the presence of coronatine.	GO:0005515;GO:0005634;GO:0009611;GO:0009695;GO:0009867;GO:0031347;GO:0042802	JAI3.JAZ3.TIFY6B	JAZ	JA	6
Pn47.111	AT5G13220	Plants overexpressing At5g13220.3, but not At5g13220.1 showed enhanced insensitivity to MeJa.;NA;Plants overexpressing At5g13220.3, but not At5g13220.1 showed enhanced insensitivity to MeJa, whereas RNAi constructs for At5g13220.3 increased MeJA sensitivity. This isoform modifies growth in response to wounding in a process that requires jasmonate signaling.	GO:0005515;GO:0005634;GO:0007165;GO:0009414;GO:0009611;GO:0009620;GO:0009695;GO:0009723;GO:0009733;GO:0009738;GO:0009753;GO:0009867;GO:0010112;GO:0042538;GO:0042803;GO:2000022	JAS1.JAZ10.TIFY9	JAZ	JA	6
Pn37.8	AT5G20900	NA	GO:0005515;GO:0005634;GO:0006612;GO:0009611;GO:0009867;GO:0009963;GO:0010363	JAZ12.TIFY3B	JAZ	JA	5
Pn4.1578	AT1G74950	NA	GO:0005515;GO:0005634;GO:0006612;GO:0007165;GO:0009414;GO:0009611;GO:0009620;GO:0009695;GO:0009723;GO:0009733;GO:0009738;GO:0009753;GO:0009863;GO:0009867;GO:0010363;GO:0042538;GO:0043069	JAZ2.TIFY10B	JAZ	JA	2
Pn2.1849	AT2G43790	Encodes a MAP kinase induced by pathogens, ethylene biosynthesis, oxidative stress and osmotic stress.Also involved in ovule development. Homozygous mutants in a MPK3 heterozygous background are female sterile due to defects in integument development.MPK6 appears to be associated with the microsomal compartment and may be involved in mediating secretory processes.	GO:0000165;GO:0000302;GO:0000303;GO:0004672;GO:0004707;GO:0005515;GO:0005634;GO:0005802;GO:0006612;GO:0006970;GO:0006979;GO:0007154;GO:0007165;GO:0009409;GO:0009524;GO:0009574;GO:0009651;GO:0009723;GO:0009733;GO:0009737;GO:0009738;GO:0009743;GO:0009751;GO:0009862;GO:0009864;GO:0009867;GO:0009873;GO:0010120;GO:0010224;GO:0010229;GO:0010363;GO:0010374;GO:0016301;GO:0016310;GO:0030968;GO:0031348;GO:…	ATMAPK6.ATMPK6.MAPK6.MPK6	MPK6	Ethylene	5
Pn2.2276	AT2G43790	Encodes a MAP kinase induced by pathogens, ethylene biosynthesis, oxidative stress and osmotic stress.Also involved in ovule development. Homozygous mutants in a MPK3 heterozygous background are female sterile due to defects in integument development.MPK6 appears to be associated with the microsomal compartment and may be involved in mediating secretory processes.	GO:0000165;GO:0000302;GO:0000303;GO:0004672;GO:0004707;GO:0005515;GO:0005634;GO:0005802;GO:0006612;GO:0006970;GO:0006979;GO:0007154;GO:0007165;GO:0009409;GO:0009524;GO:0009574;GO:0009651;GO:0009723;GO:0009733;GO:0009737;GO:0009738;GO:0009743;GO:0009751;GO:0009862;GO:0009864;GO:0009867;GO:0009873;GO:0010120;GO:0010224;GO:0010229;GO:0010363;GO:0010374;GO:0016301;GO:0016310;GO:0030968;GO:0031348;GO:…	ATMAPK6.ATMPK6.MAPK6.MPK6	MPK6	Ethylene	4
Pn15.1112	AT1G64280	This gene is a key regulator of the salicylic acid (SA)-mediated systemic acquired resistance (SAR) pathway. It is similar to the transcription factor inhibitor I kappa B, and contains ankyrin repeats. It confers resistance to the pathogens Pseudomonas syringae and Peronospora parasitica in a dosage-dependent fashion. Although transgenic Arabidopsis plants overexpressing NPR1 acquire enhanced sen…	GO:0000165;GO:0002679;GO:0005515;GO:0005634;GO:0005737;GO:0006355;GO:0006612;GO:0007154;GO:0008219;GO:0009408;GO:0009409;GO:0009410;GO:0009595;GO:0009611;GO:0009617;GO:0009625;GO:0009627;GO:0009682;GO:0009697;GO:0009738;GO:0009862;GO:0009863;GO:0009867;GO:0010112;GO:0010200;GO:0010310;GO:0010363;GO:0016045;GO:0030968;GO:0031347;GO:0031348;GO:0035304;GO:0042742;GO:0043069;GO:0043900;GO:0045087;GO:…	ATNPR1.NIM1.NPR1.SAI1	NPR1	SA	5
Pn3.621	AT1G64280	This gene is a key regulator of the salicylic acid (SA)-mediated systemic acquired resistance (SAR) pathway. It is similar to the transcription factor inhibitor I kappa B, and contains ankyrin repeats. It confers resistance to the pathogens Pseudomonas syringae and Peronospora parasitica in a dosage-dependent fashion. Although transgenic Arabidopsis plants overexpressing NPR1 acquire enhanced sen…	GO:0000165;GO:0002679;GO:0005515;GO:0005634;GO:0005737;GO:0006355;GO:0006612;GO:0007154;GO:0008219;GO:0009408;GO:0009409;GO:0009410;GO:0009595;GO:0009611;GO:0009617;GO:0009625;GO:0009627;GO:0009682;GO:0009697;GO:0009738;GO:0009862;GO:0009863;GO:0009867;GO:0010112;GO:0010200;GO:0010310;GO:0010363;GO:0016045;GO:0030968;GO:0031347;GO:0031348;GO:0035304;GO:0042742;GO:0043069;GO:0043900;GO:0045087;GO:…	ATNPR1.NIM1.NPR1.SAI1	NPR1	SA	6
Pn2.1254	AT5G45110	Encodes a paralog of NPR1. Involved in negative regulation of defense responses against bacterial and oomycete pathogens. npr3 mutants has elevated level of PR1 expression. Interacts with TGA2, TGA3, TGA5 and TGA6 in yeast two hybrid assays.	GO:0005515;GO:0006612;GO:0009410;GO:0009617;GO:0009627;GO:0009697;GO:0009816;GO:0009817;GO:0009862;GO:0009863;GO:0009867;GO:0010200;GO:0010363;GO:0031348;GO:0043069;GO:0045087;GO:0050832;GO:0052542;GO:0080185;GO:1901149	ATNPR3.NPR3	NPR1	SA	4
Pn6.1892	AT5G45110	Encodes a paralog of NPR1. Involved in negative regulation of defense responses against bacterial and oomycete pathogens. npr3 mutants has elevated level of PR1 expression. Interacts with TGA2, TGA3, TGA5 and TGA6 in yeast two hybrid assays.	GO:0005515;GO:0006612;GO:0009410;GO:0009617;GO:0009627;GO:0009697;GO:0009816;GO:0009817;GO:0009862;GO:0009863;GO:0009867;GO:0010200;GO:0010363;GO:0031348;GO:0043069;GO:0045087;GO:0050832;GO:0052542;GO:0080185;GO:1901149	ATNPR3.NPR3	NPR1	SA	8
Pn24.750	AT4G19660	Encodes a ankyrin repeat BTB/POZ domain-containing protein with 36% sequence identity with NPR1. Mutants are more susceptible to the bacterial pathogen Pseudomonas syringe pv. tomato DC3000 and to the fungal pathogen Erysiphe cichoracearum, but do not differ markedly from wild type in interaction with virulent and avirulent strains of the oomycete Peronospora parasitica. NPR4 is required for basa…	GO:0005515;GO:0005634;GO:0009410;GO:0009617;GO:0009620;GO:0009627;GO:0009816;GO:0009817;GO:0009862;GO:0031347;GO:0042742;GO:0050832;GO:0080185;GO:1901149;GO:2000022;GO:2000031	ATNPR4.NPR4	NPR1	SA	5
Pn18.144	AT2G41370	Encodes BOP2, a cytoplasmic and nuclear-localized NPR1 like protein with BTB/POZ domain and ankyrin repeats. Interacts with BOP1 and appears to be genetically redundant with BOP1.bop1/bop2 double mutants have longer leaves, often with leaflets on the petiole, asymmetric flowers with extra organs and no nectaries. Also defective in floral organ abscission. BOP1/2 promotes floral meristem fate and …	GO:0005515;GO:0005634;GO:0005737;GO:0009864;GO:0009944;GO:0009954;GO:0010227;GO:0010254;GO:0010434;GO:0010582;GO:0048439	BOP2	NPR1	SA	4
Pn28.411	AT2G41370	Encodes BOP2, a cytoplasmic and nuclear-localized NPR1 like protein with BTB/POZ domain and ankyrin repeats. Interacts with BOP1 and appears to be genetically redundant with BOP1.bop1/bop2 double mutants have longer leaves, often with leaflets on the petiole, asymmetric flowers with extra organs and no nectaries. Also defective in floral organ abscission. BOP1/2 promotes floral meristem fate and …	GO:0005515;GO:0005634;GO:0005737;GO:0009864;GO:0009944;GO:0009954;GO:0010227;GO:0010254;GO:0010434;GO:0010582;GO:0048439	BOP2	NPR1	SA	4
Pn43.32	AT2G41370	Encodes BOP2, a cytoplasmic and nuclear-localized NPR1 like protein with BTB/POZ domain and ankyrin repeats. Interacts with BOP1 and appears to be genetically redundant with BOP1.bop1/bop2 double mutants have longer leaves, often with leaflets on the petiole, asymmetric flowers with extra organs and no nectaries. Also defective in floral organ abscission. BOP1/2 promotes floral meristem fate and …	GO:0005515;GO:0005634;GO:0005737;GO:0009864;GO:0009944;GO:0009954;GO:0010227;GO:0010254;GO:0010434;GO:0010582;GO:0048439	BOP2	NPR1	SA	1
Pn29.253	AT2G43010	Isolated as a semidominant mutation defective in red -light responses. Encodes a nuclear localized bHLH protein that interacts with active PhyB protein. Negatively regulates phyB mediated red light responses. Involved in shade avoidance response. Protein abundance is negatively regulated by PhyB.	GO:0000165;GO:0003677;GO:0003700;GO:0005515;GO:0005634;GO:0006355;GO:0006612;GO:0007623;GO:0009617;GO:0009630;GO:0009704;GO:0009862;GO:0009867;GO:0010017;GO:0010161;GO:0010310;GO:0010363;GO:0010600;GO:0010928;GO:0030003;GO:0031348;GO:0035304	AtPIF4.PIF4.SRL2	PIF	GA	5
Pn3.805	AT4G26080	Involved in abscisic acid (ABA) signal transduction. Negative regulator of ABA promotion of stomatal closure.	GO:0000165;GO:0000303;GO:0004722;GO:0005509;GO:0005515;GO:0005634;GO:0006470;GO:0006612;GO:0006914;GO:0007154;GO:0007165;GO:0008219;GO:0008287;GO:0009408;GO:0009409;GO:0009414;GO:0009611;GO:0009723;GO:0009733;GO:0009737;GO:0009738;GO:0009753;GO:0009787;GO:0009788;GO:0009862;GO:0009863;GO:0009867;GO:0009873;GO:0010029;GO:0010119;GO:0010363;GO:0019901;GO:0030968;GO:0031348;GO:0042538;GO:0043069;GO:…	ABI1.AtABI1	PP2C	ABA	3
Pn2.1537	AT3G11410	Encodes protein phosphatase 2C. Negative regulator of ABA signalling. Expressed in seeds during germination. mRNA up-regulated by drought and ABA.	GO:0004721;GO:0004722;GO:0005515;GO:0005634;GO:0005737;GO:0005829;GO:0009409;GO:0009414;GO:0009737;GO:0009738;GO:0009788;GO:0010119;GO:0042538	AHG3.ATPP2CA.PP2CA	PP2C	ABA	3
Pn2.1665	AT3G11410	Encodes protein phosphatase 2C. Negative regulator of ABA signalling. Expressed in seeds during germination. mRNA up-regulated by drought and ABA.	GO:0004721;GO:0004722;GO:0005515;GO:0005634;GO:0005737;GO:0005829;GO:0009409;GO:0009414;GO:0009737;GO:0009738;GO:0009788;GO:0010119;GO:0042538	AHG3.ATPP2CA.PP2CA	PP2C	ABA	3
Pn24.188	AT3G11410	Encodes protein phosphatase 2C. Negative regulator of ABA signalling. Expressed in seeds during germination. mRNA up-regulated by drought and ABA.	GO:0004721;GO:0004722;GO:0005515;GO:0005634;GO:0005737;GO:0005829;GO:0009409;GO:0009414;GO:0009737;GO:0009738;GO:0009788;GO:0010119;GO:0042538	AHG3.ATPP2CA.PP2CA	PP2C	ABA	4
Pn7.1767	AT1G07430	NA	GO:0004722;GO:0005886;GO:0009738;GO:0009788;GO:0009939;GO:0010030;GO:0048838;GO:1902039	AIP1.AtAIP1.HAI2.HON	PP2C	ABA	3
Pn6.3618	AT1G72770	mutant has ABA hypersensitive inhibition of seed germination; Protein Phosphatase 2C; regulates the activation of the Snf1-related kinase OST1 by abscisic acid.	GO:0004722;GO:0005515;GO:0009610;GO:0010029	AtHAB1.HAB1	PP2C	ABA	7
Pn16.918	AT5G59220	NA	GO:0004722;GO:0005634;GO:0005794;GO:0005829;GO:0005886;GO:0007165;GO:0009409;GO:0009414;GO:0009611;GO:0009658;GO:0009723;GO:0009733;GO:0009737;GO:0009738;GO:0009753;GO:0009788;GO:0010118;GO:0010150;GO:0033106;GO:0042538	HAI1.SAG113	PP2C	ABA	3
Pn4.3042	AT5G59220	NA	GO:0004722;GO:0005634;GO:0005794;GO:0005829;GO:0005886;GO:0007165;GO:0009409;GO:0009414;GO:0009611;GO:0009658;GO:0009723;GO:0009733;GO:0009737;GO:0009738;GO:0009753;GO:0009788;GO:0010118;GO:0010150;GO:0033106;GO:0042538	HAI1.SAG113	PP2C	ABA	3
Pn2.340	AT2G14610	PR1 gene expression is induced in response to a variety of pathogens. It is a useful molecular marker for the SAR response. Though the Genbank record for the cDNA associated to this gene is called 'PR-1-like', the sequence actually corresponds to PR1. Expression of this gene is salicylic-acid responsive.	GO:0000165;GO:0003674;GO:0005576;GO:0005618;GO:0006612;GO:0006952;GO:0009414;GO:0009595;GO:0009627;GO:0009697;GO:0009753;GO:0009862;GO:0009867;GO:0010200;GO:0010266;GO:0010310;GO:0010363;GO:0031348;GO:0034976;GO:0042742;GO:0043900;GO:0045088;GO:0050832	ATPR1.PR.PR1	PR1	SA	6
Pn2.433	AT2G14610	PR1 gene expression is induced in response to a variety of pathogens. It is a useful molecular marker for the SAR response. Though the Genbank record for the cDNA associated to this gene is called 'PR-1-like', the sequence actually corresponds to PR1. Expression of this gene is salicylic-acid responsive.	GO:0000165;GO:0003674;GO:0005576;GO:0005618;GO:0006612;GO:0006952;GO:0009414;GO:0009595;GO:0009627;GO:0009697;GO:0009753;GO:0009862;GO:0009867;GO:0010200;GO:0010266;GO:0010310;GO:0010363;GO:0031348;GO:0034976;GO:0042742;GO:0043900;GO:0045088;GO:0050832	ATPR1.PR.PR1	PR1	SA	6
Pn15.826	AT5G46790	Encodes a member of the PYR (pyrabactin resistance )/PYL(PYR1-like)/RCAR (regulatory components of ABA receptor) family proteins with 14 members. PYR/PYL/RCAR family proteins function as abscisic acid sensors. Mediate ABA-dependent regulation of protein phosphatase 2Cs ABI1 and ABI2.	GO:0004872;GO:0005515;GO:0005634;GO:0006569;GO:0009684;GO:0009738;GO:0010427;GO:0019761;GO:0042803;GO:0080163	PYL1.RCAR12	PYL	ABA	2
Pn21.1066	AT2G38310	Encodes a member of the PYR (pyrabactin resistance )/PYL(PYR1-like)/RCAR (regulatory components of ABA receptor) family proteins with 14 members. PYR/PYL/RCAR family proteins function as abscisic acid sensors. Mediate ABA-dependent regulation of protein phosphatase 2Cs ABI1 and ABI2.	GO:0004872;GO:0005515;GO:0005634;GO:0009738	PYL4.RCAR10	PYL	ABA	4
Pn4.3488	AT2G38310	Encodes a member of the PYR (pyrabactin resistance )/PYL(PYR1-like)/RCAR (regulatory components of ABA receptor) family proteins with 14 members. PYR/PYL/RCAR family proteins function as abscisic acid sensors. Mediate ABA-dependent regulation of protein phosphatase 2Cs ABI1 and ABI2.	GO:0004872;GO:0005515;GO:0005634;GO:0009738	PYL4.RCAR10	PYL	ABA	7
Pn6.1060	AT2G40330	Encodes a member of the PYR (pyrabactin resistance )/PYL(PYR1-like)/RCAR (regulatory components of ABA receptor) family proteins with 14 members. PYR/PYL/RCAR family proteins function as abscisic acid sensors. Mediate ABA-dependent regulation of protein phosphatase 2Cs ABI1 and ABI2.	GO:0005515;GO:0005634;GO:0008150;GO:0010029	PYL6.RCAR9	PYL	ABA	4
Pn21.760	AT5G53160	Encodes RCAR3, a regulatory component of ABA receptor. Interacts with protein phosphatase 2Cs ABI1 and ABI2. Stimulates ABA signaling.	GO:0004872;GO:0005515;GO:0005634;GO:0005737;GO:0005739;GO:0009737;GO:0009738;GO:0009789	PYL8.RCAR3	PYL	ABA	4
Pn13.2021	AT2G45210	NA	GO:0003674;GO:0005739;GO:0009733;GO:1900057	SAG201.SAUR36	SAUR	Auxin	6
Pn1.3625	AT4G34770	NA	GO:0009507;GO:0009733	SAUR1	SAUR	Auxin	4
Pn18.332	AT2G18010	NA	GO:0003674;GO:0009733	SAUR10	SAUR	Auxin	8
Pn1.255	AT2G21220	NA	GO:0005516;GO:0005739;GO:0009733	SAUR12	SAUR	Auxin	4
Pn10.1486	AT5G53590	NA	GO:0003674;GO:0009733	SAUR30	SAUR	Auxin	3
Pn10.1488	AT5G53590	NA	GO:0003674;GO:0009733	SAUR30	SAUR	Auxin	7
Pn18.1028	AT5G53590	NA	GO:0003674;GO:0009733	SAUR30	SAUR	Auxin	6
Pn5.875	AT5G53590	NA	GO:0003674;GO:0009733	SAUR30	SAUR	Auxin	7
Pn8.2276	AT5G53590	NA	GO:0003674;GO:0009733	SAUR30	SAUR	Auxin	8
Pn1.2872	AT4G00880	NA	GO:0003674;GO:0005739;GO:0009733	SAUR31	SAUR	Auxin	8
Pn12.404	AT4G00880	NA	GO:0003674;GO:0005739;GO:0009733	SAUR31	SAUR	Auxin	8
Pn3.1943	AT4G00880	NA	GO:0003674;GO:0005739;GO:0009733	SAUR31	SAUR	Auxin	8
Pn19.499	AT2G46690	NA	GO:0003674;GO:0005575;GO:0006816;GO:0009733	SAUR32	SAUR	Auxin	4
Pn17.1149	AT4G22620	NA	GO:0003674;GO:0005739;GO:0009733	SAUR34	SAUR	Auxin	8
Pn5.1768	AT3G43120	NA	GO:0005516;GO:0005634;GO:0009733	SAUR39	SAUR	Auxin	8
Pn3.2622	AT4G34800	NA	GO:0003674;GO:0005739;GO:0009733	SAUR4	SAUR	Auxin	5
Pn5.2364	AT3G20220	NA	GO:0003674;GO:0005634;GO:0009733	SAUR47	SAUR	Auxin	5
Pn5.2362	AT4G34750	NA	GO:0005516;GO:0005634;GO:0009733	SAUR49	SAUR	Auxin	5
Pn7.383	AT5G50760	NA	GO:0003674;GO:0009507;GO:0009733;GO:0010167;GO:0015706	SAUR55	SAUR	Auxin	2
Pn3.1077	AT5G20810	NA	GO:0005515;GO:0005516;GO:0005634;GO:0005777;GO:0009733;GO:0009827;GO:0009860	SAUR70	SAUR	Auxin	7
Pn11.601	AT1G56150	NA	GO:0003674;GO:0009733	SAUR71	SAUR	Auxin	5
Pn6.1218	AT1G56150	NA	GO:0003674;GO:0009733	SAUR71	SAUR	Auxin	5
Pn11.2195	AT3G12830	NA	GO:0003674;GO:0009733	SAUR72	SAUR	Auxin	9
Pn10.221	AT3G21220	Encodes a mitogen-activated kinase kinase, dual specific protein kinase that is expressed in vegetative tissues and floral buds. Involved in innate immunity. This protein activates MPK3/MPK6 and early-defense genes redundantly with MKK4.In plants with both MKK5 and MKK6 levels reduced by RNAi plants, floral organs do not abscise suggestion a role for both proteins in mediating floral organ abscis…	GO:0004708;GO:0005739;GO:0009814;GO:0010227;GO:0010229;GO:0015824;GO:0016301;GO:2000037	ATMAP2K_ALPHA.ATMEK5.ATMKK5.MAP2K_A.MEK5.MKK5	SIMKK	Ethylene	6
Pn3.4656	AT1G51660	Encodes a mitogen-activated map kinase kinase (there are nine in Arabidopsis) involved in innate immunity. This protein activates MPK3/MPK6 and early-defense genes redundantly with MKK5. In plants with both MKK5 and MKK6 levels reduced by RNAi plants, floral organs do not abscise suggestion a role for both proteins in mediating floral organ abscission.	GO:0000165;GO:0002679;GO:0004708;GO:0005634;GO:0005737;GO:0006355;GO:0006612;GO:0007154;GO:0009409;GO:0009595;GO:0009617;GO:0009697;GO:0009738;GO:0009814;GO:0009862;GO:0009867;GO:0010200;GO:0010227;GO:0010229;GO:0010310;GO:0010363;GO:0016301;GO:0030968;GO:0031348;GO:0035304;GO:0042742;GO:0043069;GO:0043900;GO:0045088;GO:0050832;GO:2000037;GO:2000038	ATMEK4.ATMKK4.MKK4	SIMKK	Ethylene	4
Pn12.133	AT1G10940	Encodes a plant protein kinase similar to the calcium/calmodulin-dependent protein kinase subfamily and the SNF1 kinase subfamily (SnRK2) whose activity is activated by ionic (salt) and non-ionic (mannitol) osmotic stress. Kinase activity of its homolog in tobacco is induced by hyperosmotic condition within 1 minute.	GO:0004672;GO:0005515;GO:0005634;GO:0005829;GO:0006468;GO:0006511;GO:0006970;GO:0009651;GO:0009737;GO:0016020;GO:0016301;GO:0042752;GO:0070300;GO:0080022	ASK1.SNRK2-4.SNRK2.4.SRK2A	SNRK2	Ethylene	3
Pn2.274	AT4G33950	Encodes calcium-independent ABA-activated protein kinase, a member of SNF1-related protein kinases (SnRK2) whose activity is activated by ionic (salt) and non-ionic (mannitol) osmotic stress. Mutations disrupted ABA induction of stomatal closure as well as ABA inhibition of light-induced stomatal opening. However, regulation of stomatal opening/closing by light or CO(2) is not affected in these m…	GO:0004672;GO:0005515;GO:0005634;GO:0005737;GO:0005829;GO:0005985;GO:0006636;GO:0006970;GO:0009414;GO:0009651;GO:0009737;GO:0009738;GO:0009931;GO:0010118;GO:0010119;GO:0016301;GO:0019432;GO:0040007;GO:0042742;GO:0042744;GO:0048366;GO:1902456;GO:2000377	ATOST1.OST1.P44.SNRK2-6.SNRK2.6.SRK2E	SNRK2	Ethylene	1
Pn9.1789	AT4G33950	Encodes calcium-independent ABA-activated protein kinase, a member of SNF1-related protein kinases (SnRK2) whose activity is activated by ionic (salt) and non-ionic (mannitol) osmotic stress. Mutations disrupted ABA induction of stomatal closure as well as ABA inhibition of light-induced stomatal opening. However, regulation of stomatal opening/closing by light or CO(2) is not affected in these m…	GO:0004672;GO:0005515;GO:0005634;GO:0005737;GO:0005829;GO:0005985;GO:0006636;GO:0006970;GO:0009414;GO:0009651;GO:0009737;GO:0009738;GO:0009931;GO:0010118;GO:0010119;GO:0016301;GO:0019432;GO:0040007;GO:0042742;GO:0042744;GO:0048366;GO:1902456;GO:2000377	ATOST1.OST1.P44.SNRK2-6.SNRK2.6.SRK2E	SNRK2	Ethylene	4
Pn12.1761	AT5G57560	Encodes a cell wall-modifying enzyme, rapidly upregulated in response to environmental stimuli	GO:0005618;GO:0005794;GO:0009408;GO:0009409;GO:0009507;GO:0009611;GO:0009612;GO:0009664;GO:0009733;GO:0009741;GO:0010200;GO:0010583;GO:0016762;GO:0016798	TCH4.XTH22	TCH4	BR	3
Pn14.563	AT5G57560	Encodes a cell wall-modifying enzyme, rapidly upregulated in response to environmental stimuli	GO:0005618;GO:0005794;GO:0009408;GO:0009409;GO:0009507;GO:0009611;GO:0009612;GO:0009664;GO:0009733;GO:0009741;GO:0010200;GO:0010583;GO:0016762;GO:0016798	TCH4.XTH22	TCH4	BR	9
Pn5.2650	AT5G57560	Encodes a cell wall-modifying enzyme, rapidly upregulated in response to environmental stimuli	GO:0005618;GO:0005794;GO:0009408;GO:0009409;GO:0009507;GO:0009611;GO:0009612;GO:0009664;GO:0009733;GO:0009741;GO:0010200;GO:0010583;GO:0016762;GO:0016798	TCH4.XTH22	TCH4	BR	9
Pn10.1063	AT5G06950	Transcription factor of the B-ZIP family that has high affinity for C-box motifs. Interacts with NPR1 and may regulate PR gene expression. Phosphorylated by a CK2-like protein in vitro. Phosphorylation is enhanced by salicylic acid treatment.	GO:0003677;GO:0003700;GO:0005515;GO:0005634;GO:0005737;GO:0007062;GO:0009410;GO:0009617;GO:0009862;GO:0030968;GO:0031048;GO:0045132;GO:0045892;GO:0045893;GO:0048522	AHBP-1B.TGA2	TGA	SA	7
Pn3.878	AT1G08320	NA	GO:0003677;GO:0003700;GO:0005634;GO:0009612;GO:0019722	bZIP21.TGA9	TGA	SA	5
Pn42.4	AT5G06839	NA	GO:0003677;GO:0003700;GO:0005634;GO:0009410;GO:0030968	bZIP65.TGA10	TGA	SA	4
Pn3.2098	AT5G10030	Encodes a member of basic leucine zipper transcription gene family. Nomenclature according to Xiang, et al. (1997).	GO:0003677;GO:0003700;GO:0005515;GO:0005516;GO:0005634;GO:0006857;GO:0009409;GO:0009410;GO:0030968;GO:0042742	OBF4.TGA4	TGA	SA	7
Pn10.743	AT5G65210	Encodes TGA1, a redox-controlled regulator of systemic acquired resistance. TGA1 targets the activation sequence-1 (as-1) element of the promoter region of defense proteins. TGA1 are S-nitrosylated.	GO:0003677;GO:0003700;GO:0005515;GO:0005516;GO:0005634;GO:0009410;GO:0009617;GO:0009862;GO:0010043;GO:0010167;GO:0010260;GO:0015706;GO:0030968;GO:0042742;GO:0043565	TGA1	TGA	SA	4
Pn37.25	AT3G62980	Encodes an auxin receptor that mediates auxin-regulated transcription. It contains leucine-rich repeats and an F-box and interacts with ASK1, ASK2 and AtCUL1 to form SCF-TIR1, an SCF ubiquitin ligase complex. Related to yeast Grr1p and human SKP2 proteins, involved in ubiquitin-mediated processes. Required for normal response to auxin and repressed in response to flagellin. As part of the SCF com…	GO:0000151;GO:0000822;GO:0002237;GO:0004842;GO:0005515;GO:0005634;GO:0006511;GO:0007165;GO:0009733;GO:0009734;GO:0010011;GO:0010103;GO:0010152;GO:0010311;GO:0016036;GO:0019005;GO:0042752;GO:0048443	AtTIR1.TIR1	TIR1	Auxin	8
Pn4.1784	AT3G62980	Encodes an auxin receptor that mediates auxin-regulated transcription. It contains leucine-rich repeats and an F-box and interacts with ASK1, ASK2 and AtCUL1 to form SCF-TIR1, an SCF ubiquitin ligase complex. Related to yeast Grr1p and human SKP2 proteins, involved in ubiquitin-mediated processes. Required for normal response to auxin and repressed in response to flagellin. As part of the SCF com…	GO:0000151;GO:0000822;GO:0002237;GO:0004842;GO:0005515;GO:0005634;GO:0006511;GO:0007165;GO:0009733;GO:0009734;GO:0010011;GO:0010103;GO:0010152;GO:0010311;GO:0016036;GO:0019005;GO:0042752;GO:0048443	AtTIR1.TIR1	TIR1	Auxin	8
